# Supplementary material for: Gypsum as a potential tracer of earthquake: a case study of the Mw7.8 earthquake in the East Anatolian Fault Zone, southeastern Turkey
Source: Copernicus journal article supplement (doi:10.5194/hess-2024-395), 2024-12-20
Supplement: Supplementary file 1 [file hess-2024-395-supplement.zip]

**Supporting Information for**

**Gypsum as a potential tracer of earthquake: a case study of the *Mw*7.8 earthquake in the East Anatolian Fault Zone, southeastern Turkey**

Zebin Luoa, Xiaocheng Zhoub,c[[1]](#footnote-1)★, Yueren Xub, Peng Liangb, Huiping Zhangd, Jinlong Liange,Zhaojun Zengb, Yucong Yanc, Zheng Gongf, Shiguang Wangf, Chuanyou Lid, Zhikun Rend, Jingxing Yud, Zifa Mad, Junjie Lid

*aSchool of Emergency Management, Xihua University, Chengdu 610039, China*

*bUnited Laboratory of High-Pressure Physics and Earthquake Science, institute of earthquake forecasting, CEA, Beijing 100036, China*

*cSchool of Earth Sciences and Resources, China University of Geosciences, Beijing 100083, China*

*dInstitute of Geology, China Earthquake Administration, Beijing, 100081, China*

*eCollege of Earth Science, Chengdu University of Technology, Chengdu 610059, China*

*fInstitute of Geophysics, China Earthquake Administration, Beijing, 100081, China*

**Contents of this file**

**Part1:** Table S1**.** Temperature results obtained with empirical chemical geothermometers (values in oC)and depths (km) of origin for EAFZ geothermal waters.

**Part2:** The water-rock interaction process of EAFZ geothermal water is simulated by PHREEQC software.

**Part3:** Supplementary Figures

Figure S1. Macroscopic anomaly of geothermal fluid before and after the *Mw* 7.8 earthquake.

Figure S2. Statistical Figuer of trace elements (B, Al, Ba, Li, Ra and Sr). Literature data from (Aydin et al., 2020; Baba et al., 2019; Okan et al., 2018; Yuce et al., 2014; Pasvanoglu, 2020).

Figure S3. Spider diagram of the water in the EAFZ. Enrichment coefficients (weight ratios) normalized by Ti. EFi=(Ci/CTi)w/(Ci/CTi)r, where i is element, w is water, r is rock Rocks chemistry are taken from (Nurlu, 2020).

**Part4. Videos:**

Video. 01 Seismic precursor anomaly of HS14 geothermal fluid. Shooting time: A month before the earthquake.

Video. 02 Post-earthquake anomaly of HS04 geothermal fluid. Shooting time: March 26th, 2023.

**Part 1:**

Table S1. Temperature results obtained with empirical chemical geothermometers (values in oC)and depths (km) of origin for EAFZ geothermal waters.

| No | T  (oC) | Na-K | | | K-Mg | Li-Mg | Na-Li | Na-Ca | K-Ca | Na-K-Ca | SiO2 | | | Circulation depth(km) |
| --- | --- | --- | --- | --- | --- | --- | --- | --- | --- | --- | --- | --- | --- | --- |
| a | b | c | d | e | f | g | k | i | j | k | l |
| HS01 | 15.8 | 280.56 | 263.18 | 255.02 | 53.70 | 1164.31 | 115.33 | 113.53 | 167.74 | 177.81 | 64.74 | 76.87 | 32.72 | 1.8 |
| HS02 | 13.2 | 44.69 | 32.02 | 14.64 | 340.90 | 794.35 | 58.83 | -19.47 | -23.39 | 16.11 | 19.81 | 35.51 | -13.08 | 0.0 |
| HS03 | 13.2 | 97.13 | 83.05 | 65.94 | 110.59 | 329.25 | 256.42 | 136.38 | 80.14 | 78.41 | 74.15 | 85.36 | 42.54 | 2.2 |
| HS04 | 15.0 | 137.35 | 122.34 | 106.10 | 118.49 | 424.51 | 63.34 | 77.09 | 74.70 | 109.03 | 128.09 | 132.88 | 100.43 | 4.4 |
| HS05 | 12.7 | 183.61 | 167.67 | 153.17 | 101.56 | 722.02 | -11.79 | 69.20 | 92.54 | 139.57 | 51.58 | 64.90 | 19.12 | 1.3 |
| HS06 | 15.0 | 211.67 | 195.23 | 182.19 | 117.90 | 1098.86 | -23.85 | 43.82 | 87.06 | 149.16 | 53.76 | 66.89 | 21.36 | 1.4 |
| HS07 | 9.8 | 24.22 | 12.15 | -5.07 | 328.05 | 756.00 | 28.67 | -0.77 | -23.53 | 6.19 | 37.30 | 51.78 | 4.54 | 0.7 |
| HS08 | 8.1 | 16.25 | 4.41 | -12.71 | 326.88 | 752.56 | 17.37 | 8.17 | -23.55 | 2.17 | 53.32 | 66.49 | 20.90 | 1.4 |
| HS09 | 18.0 | 161.91 | 146.39 | 130.98 | 127.21 | 539.15 | 49.11 | 59.01 | 76.01 | 121.33 | 72.83 | 84.17 | 41.15 | 2.1 |
| HS10 | 20.0 | 7.89 | -3.69 | -20.68 | 456.36 | 1200.82 | 5.80 | 38.91 | -15.52 | 1.49 | 81.15 | 91.63 | 49.90 | 2.5 |
| HS11 | 16.3 | 166.55 | 150.93 | 135.70 | 148.33 | 985.95 | -6.80 | 27.09 | 57.05 | 113.61 | 38.24 | 52.65 | 5.49 | 0.8 |
| HS12 | 16.9 | 0.78 | -10.57 | -27.44 | 436.27 | 1120.85 | -3.85 | 56.07 | -13.62 | -1.56 | 98.46 | 107.00 | 68.28 | 3.2 |
| HS13 | 18.2 | 232.80 | 216.03 | 204.29 | 97.49 | 530.50 | 52.80 | 54.40 | 103.32 | 166.87 | 39.42 | 53.74 | 6.69 | 0.8 |
| HS14 | 23.5 | 226.40 | 209.73 | 197.58 | 48.47 | 350.37 | 216.09 | 188.63 | 187.64 | 224.53 | 87.85 | 97.61 | 56.98 | 2.7 |
| HS15 | 32.0 | 150.02 | 134.74 | 118.90 | 26.34 | 286.57 | 170.79 | 210.97 | 148.15 | 176.18 | -39.83 | -21.62 | -71.20 |  |
| HS16 | 24.5 | 299.42 | 281.83 | 275.35 | 25.48 | 540.78 | 122.71 | 258.29 | 274.78 | 375.41 | 82.83 | 93.13 | 51.67 | 2.5 |

Note: Circulation depth(km) =(T-T0)/g+h. “T” is reservoir temperature estimated by SiO2. “T0” is annual average temperature in EAFZ is 20 °C. “g” is geothermal gradient is ~2.50 °C/100 m. “h” is thickness of the constant temperature zone is 30 m.

a Na-K, T = 1390 / [log(Na/K) + 1.75] - 273.15 (Giggenbach, 1988).

b Na-K, T = 933 / [log(Na/K) + 0.993] - 273.15 (Arnórsson, 1983).

c Na-K, T = 1178 / [log(Na/K) + 1.47] - 273.15 (Nieva and Nieva, 1987).

d K-Mg, T = 4410 / [log(K/Mg1/2) + 14.0] - 273.15 (Giggenbach, 1988).

e Li-Mg, T = 2200 / [log(Li/Mg1/2) + 5.47] - 273.15 (Kharaka and Mariner, 1989).

f Na-Li, T = 1000 / [log(Na/Li) + 0.389] - 273.15 (Fouillac and Michard, 1981).

g Na-Ca, T = 1096.7 / [3.08 - log(Na/Ca1/2)] - 273.15 (Tonani, 1980).

h K-Ca, T = 1930 / [3.861 - log(K/Ca1/2)] - 273.15 (Tonani, 1980).

i Na-K-Ca, T = 1647 / [log(Na/K) +1/3log(Ca1/2/Na)+ 2.24] - 273.15 (Fournier and Truesdell, 1973).

j Quartz, no steam loss, T = 1309 / [5.19 - log(SiO2)] - 273.15 (Fournier, 1977).

k Quartz, maximum steam loss, T = 1522/ [5.75 - log(SiO2)] - 273.15 (Fournier, 1977).

l Chalcedony, T = 1032 / [4.78 - log(SiO2)] - 273.15 (Fournier, 1977).

**Part 2:**

PHREEQC is a powerful water chemistry simulation software. In this study, we used its function to simulate “Irreversible Reactions” (Parkhurst and Appelo, 2013).

**SOLUTION_SPREAD** setup:

HS08 is a river sample, and the initial simulated water sample is defined as the chemical composition of HS08. The initial temperature is 53oC, which is the thermal reservoir temperature of the river water estimated by SiO2.

**EQUILIBRIUM_PHASES** setup:

Italiano et al. (2013) reported that the carbon dioxide volume fraction of EAFZ ranges from 88.4% to 99.9%. Therefore, the initial CO2 percentage is set as 88.4%, and the logarithm is 1.95. Barite (BaSO4) is also set to allow precipitation.

**REACTION** setup:

We set up 3 groups of reactants mixed in different proportions respectively, as shown in Table S2:

| Table S2. The proportion of minerals added | | | | | | |
| --- | --- | --- | --- | --- | --- | --- |
| Mineral | Calcite | Gypsum | Anorthite | Dolomite | Barite | Celestite |
| R1 | 0 | 1 | 0 | 0 | 0.005 | 0.01 |
| R2 | 0.2 | 1 | 0.2 | 0.2 | 0.005 | 0.01 |
| R3 | 1 | 1 | 1 | 1 | 0.005 | 0.01 |
| R4 | 1 | 0 | 1 | 1 | 0.005 | 0.01 |

The total amount of reaction was set to 0.006mol, and the reaction was carried out in 20 steps. The simulation results are shown in Table S3.

Table S3. Simulation results of water-rock interaction in the EAFZ by PHREEQC.

| step | R1 | | | | | | R2 | | | | | |
| --- | --- | --- | --- | --- | --- | --- | --- | --- | --- | --- | --- | --- |
| Ba2+  (mol/L) | Ca2+  (mol/L) | HCO3-  (mol/L) | Mg2+  (mol/L) | SO42-  (mol/L) | Sr2+  (mol/L) | Ba2+  (mol/L) | Ca2+  (mol/L) | HCO3-  (mol/L) | Mg2+  (mol/L) | SO42-  (mol/L) | Sr2+  (mol/L) |
| 0 | 1.36E-08 | 1.37E-03 | 0.00E+00 | 1.80E-04 | 4.84E-05 | 6.32E-07 | 1.36E-08 | 1.37E-03 | 0.00E+00 | 1.80E-04 | 4.84E-05 | 6.32E-07 |
| 1 | 1.48E-06 | 1.62E-03 | 1.32E-04 | 1.71E-04 | 2.91E-04 | 3.47E-06 | 1.39E-06 | 1.79E-03 | 7.19E-04 | 2.27E-04 | 2.85E-04 | 3.43E-06 |
| 2 | 8.63E-07 | 1.87E-03 | 1.34E-04 | 1.63E-04 | 5.27E-04 | 6.16E-06 | 9.63E-07 | 2.19E-03 | 1.28E-03 | 2.70E-04 | 5.12E-04 | 6.03E-06 |
| 3 | 6.29E-07 | 2.10E-03 | 1.36E-04 | 1.56E-04 | 7.60E-04 | 8.73E-06 | 7.25E-07 | 2.58E-03 | 1.81E-03 | 3.11E-04 | 7.31E-04 | 8.48E-06 |
| 4 | 5.06E-07 | 2.34E-03 | 1.38E-04 | 1.51E-04 | 9.88E-04 | 1.12E-05 | 5.98E-07 | 2.97E-03 | 2.32E-03 | 3.52E-04 | 9.43E-04 | 1.08E-05 |
| 5 | 4.29E-07 | 2.57E-03 | 1.39E-04 | 1.46E-04 | 1.21E-03 | 1.36E-05 | 5.18E-07 | 3.35E-03 | 2.81E-03 | 3.91E-04 | 1.15E-03 | 1.31E-05 |
| 6 | 3.76E-07 | 2.79E-03 | 1.41E-04 | 1.42E-04 | 1.43E-03 | 1.59E-05 | 4.63E-07 | 3.72E-03 | 3.27E-03 | 4.29E-04 | 1.35E-03 | 1.53E-05 |
| 7 | 3.38E-07 | 3.01E-03 | 1.42E-04 | 1.39E-04 | 1.65E-03 | 1.82E-05 | 4.23E-07 | 4.09E-03 | 3.72E-03 | 4.67E-04 | 1.55E-03 | 1.74E-05 |
| 8 | 3.08E-07 | 3.23E-03 | 1.44E-04 | 1.35E-04 | 1.87E-03 | 2.04E-05 | 3.91E-07 | 4.45E-03 | 4.15E-03 | 5.04E-04 | 1.74E-03 | 1.95E-05 |
| 9 | 2.85E-07 | 3.45E-03 | 1.45E-04 | 1.32E-04 | 2.08E-03 | 2.25E-05 | 3.67E-07 | 4.81E-03 | 4.57E-03 | 5.40E-04 | 1.93E-03 | 2.16E-05 |
| 10 | 2.66E-07 | 3.66E-03 | 1.46E-04 | 1.30E-04 | 2.29E-03 | 2.47E-05 | 3.46E-07 | 5.16E-03 | 4.98E-03 | 5.76E-04 | 2.12E-03 | 2.36E-05 |
| 11 | 2.50E-07 | 3.87E-03 | 1.48E-04 | 1.28E-04 | 2.50E-03 | 2.67E-05 | 3.30E-07 | 5.51E-03 | 5.37E-03 | 6.11E-04 | 2.30E-03 | 2.55E-05 |
| 12 | 2.37E-07 | 4.08E-03 | 1.49E-04 | 1.25E-04 | 2.71E-03 | 2.88E-05 | 3.15E-07 | 5.86E-03 | 5.76E-03 | 6.46E-04 | 2.49E-03 | 2.75E-05 |
| 13 | 2.26E-07 | 4.29E-03 | 1.50E-04 | 1.23E-04 | 2.91E-03 | 3.08E-05 | 3.03E-07 | 6.20E-03 | 6.14E-03 | 6.80E-04 | 2.67E-03 | 2.94E-05 |
| 14 | 2.16E-07 | 4.49E-03 | 1.51E-04 | 1.21E-04 | 3.12E-03 | 3.28E-05 | 2.92E-07 | 6.55E-03 | 6.51E-03 | 7.14E-04 | 2.84E-03 | 3.13E-05 |
| 15 | 2.07E-07 | 4.70E-03 | 1.52E-04 | 1.20E-04 | 3.32E-03 | 3.48E-05 | 2.83E-07 | 6.89E-03 | 6.87E-03 | 7.48E-04 | 3.02E-03 | 3.32E-05 |
| 16 | 2.00E-07 | 4.90E-03 | 1.53E-04 | 1.18E-04 | 3.52E-03 | 3.68E-05 | 2.74E-07 | 7.22E-03 | 7.23E-03 | 7.81E-04 | 3.19E-03 | 3.50E-05 |
| 17 | 1.93E-07 | 5.10E-03 | 1.54E-04 | 1.17E-04 | 3.72E-03 | 3.87E-05 | 2.67E-07 | 7.56E-03 | 7.58E-03 | 8.14E-04 | 3.37E-03 | 3.68E-05 |
| 18 | 1.87E-07 | 5.30E-03 | 1.55E-04 | 1.15E-04 | 3.92E-03 | 4.06E-05 | 2.60E-07 | 7.89E-03 | 7.93E-03 | 8.47E-04 | 3.54E-03 | 3.86E-05 |
| 19 | 1.81E-07 | 5.49E-03 | 1.56E-04 | 1.14E-04 | 4.11E-03 | 4.25E-05 | 2.54E-07 | 8.22E-03 | 8.28E-03 | 8.79E-04 | 3.71E-03 | 4.04E-05 |
| 20 | 1.76E-07 | 5.69E-03 | 1.57E-04 | 1.13E-04 | 4.31E-03 | 4.44E-05 | 2.48E-07 | 8.55E-03 | 8.62E-03 | 9.11E-04 | 3.88E-03 | 4.22E-05 |
| step | R3 | | | | | | R4 | | | | | |
| Ba2+  (mol/L) | Ca2+  (mol/L) | HCO3-  (mol/L) | Mg2+  (mol/L) | SO42-  (mol/L) | Sr2+  (mol/L) | Ba2+  (mol/L) | Ca2+  (mol/L) | HCO3-  (mol/L) | Mg2+  (mol/L) | SO42-  (mol/L) | Sr2+  (mol/L) |
| 0 | 1.36E-08 | 1.37E-03 | 0.00E+00 | 1.80E-04 | 4.84E-05 | 6.32E-07 | 1.36E-08 | 1.37E-03 | 0.00E+00 | 1.80E-04 | 4.84E-05 | 6.32E-07 |
| 1 | 1.37E-06 | 2.44E-03 | 2.81E-03 | 4.46E-04 | 2.71E-04 | 3.28E-06 | 1.72E-06 | 2.20E-03 | 2.81E-03 | 4.66E-04 | 4.80E-05 | 3.36E-06 |
| 2 | 1.30E-06 | 3.46E-03 | 4.99E-03 | 6.94E-04 | 4.69E-04 | 5.65E-06 | 3.33E-06 | 3.01E-03 | 5.00E-03 | 7.42E-04 | 4.87E-05 | 5.85E-06 |
| 3 | 1.06E-06 | 4.46E-03 | 6.91E-03 | 9.31E-04 | 6.52E-04 | 7.87E-06 | 4.89E-06 | 3.80E-03 | 6.92E-03 | 1.01E-03 | 4.97E-05 | 8.20E-06 |
| 4 | 9.24E-07 | 5.43E-03 | 8.69E-03 | 1.16E-03 | 8.24E-04 | 9.97E-06 | 6.41E-06 | 4.58E-03 | 8.71E-03 | 1.28E-03 | 5.09E-05 | 1.04E-05 |
| 5 | 8.37E-07 | 6.39E-03 | 1.04E-02 | 1.38E-03 | 9.90E-04 | 1.20E-05 | 7.89E-06 | 5.34E-03 | 1.04E-02 | 1.54E-03 | 5.23E-05 | 1.26E-05 |
| 6 | 7.76E-07 | 7.32E-03 | 1.20E-02 | 1.60E-03 | 1.15E-03 | 1.39E-05 | 9.34E-06 | 6.10E-03 | 1.21E-02 | 1.80E-03 | 5.39E-05 | 1.47E-05 |
| 7 | 7.31E-07 | 8.24E-03 | 1.36E-02 | 1.82E-03 | 1.31E-03 | 1.58E-05 | 1.08E-05 | 6.84E-03 | 1.37E-02 | 2.05E-03 | 5.54E-05 | 1.67E-05 |
| 8 | 6.95E-07 | 9.15E-03 | 1.52E-02 | 2.03E-03 | 1.46E-03 | 1.76E-05 | 1.22E-05 | 7.57E-03 | 1.53E-02 | 2.30E-03 | 5.71E-05 | 1.87E-05 |
| 9 | 6.66E-07 | 1.00E-02 | 1.67E-02 | 2.24E-03 | 1.61E-03 | 1.94E-05 | 1.35E-05 | 8.29E-03 | 1.68E-02 | 2.55E-03 | 5.88E-05 | 2.05E-05 |
| 10 | 6.42E-07 | 1.09E-02 | 1.82E-02 | 2.44E-03 | 1.76E-03 | 2.12E-05 | 1.49E-05 | 9.00E-03 | 1.83E-02 | 2.79E-03 | 6.05E-05 | 2.24E-05 |
| 11 | 6.22E-07 | 1.18E-02 | 1.97E-02 | 2.64E-03 | 1.90E-03 | 2.28E-05 | 1.62E-05 | 9.70E-03 | 1.99E-02 | 3.03E-03 | 6.23E-05 | 2.42E-05 |
| 12 | 6.05E-07 | 1.26E-02 | 2.12E-02 | 2.84E-03 | 2.05E-03 | 2.45E-05 | 1.75E-05 | 1.04E-02 | 2.14E-02 | 3.27E-03 | 6.41E-05 | 2.60E-05 |
| 13 | 5.90E-07 | 1.35E-02 | 2.27E-02 | 3.03E-03 | 2.19E-03 | 2.61E-05 | 1.79E-05 | 1.11E-02 | 2.29E-02 | 3.50E-03 | 6.53E-05 | 2.77E-05 |
| 14 | 5.76E-07 | 1.43E-02 | 2.42E-02 | 3.23E-03 | 2.33E-03 | 2.77E-05 | 1.83E-05 | 1.18E-02 | 2.44E-02 | 3.74E-03 | 6.65E-05 | 2.94E-05 |
| 15 | 5.64E-07 | 1.52E-02 | 2.56E-02 | 3.42E-03 | 2.47E-03 | 2.92E-05 | 1.86E-05 | 1.24E-02 | 2.58E-02 | 3.97E-03 | 6.77E-05 | 3.10E-05 |
| 16 | 5.54E-07 | 1.60E-02 | 2.71E-02 | 3.61E-03 | 2.61E-03 | 3.08E-05 | 1.89E-05 | 1.31E-02 | 2.73E-02 | 4.20E-03 | 6.89E-05 | 3.26E-05 |
| 17 | 5.44E-07 | 1.68E-02 | 2.85E-02 | 3.79E-03 | 2.75E-03 | 3.23E-05 | 1.92E-05 | 1.38E-02 | 2.88E-02 | 4.42E-03 | 7.01E-05 | 3.42E-05 |
| 18 | 5.35E-07 | 1.76E-02 | 2.99E-02 | 3.98E-03 | 2.89E-03 | 3.37E-05 | 1.95E-05 | 1.44E-02 | 3.02E-02 | 4.65E-03 | 7.13E-05 | 3.58E-05 |
| 19 | 5.27E-07 | 1.84E-02 | 3.13E-02 | 4.16E-03 | 3.02E-03 | 3.52E-05 | 1.97E-05 | 1.51E-02 | 3.16E-02 | 4.87E-03 | 7.26E-05 | 3.73E-05 |
| 20 | 5.19E-07 | 1.92E-02 | 3.28E-02 | 4.34E-03 | 3.16E-03 | 3.66E-05 | 2.00E-05 | 1.57E-02 | 3.31E-02 | 5.09E-03 | 7.38E-05 | 3.88E-05 |

**Part 3.**

Figure S1. Macroscopic anomaly of geothermal fluid before and after the *Mw* 7.8 earthquake. Before the earthquake, the water of HS14 appeared white and became cloudy (a). After the earthquake, it returned to clear and transparent (b). Shooting time: a: A month before the earthquake. b: March 26th, 2023. The seismic precursor anomaly of HS14 geothermal fluid is shown in Video 01.


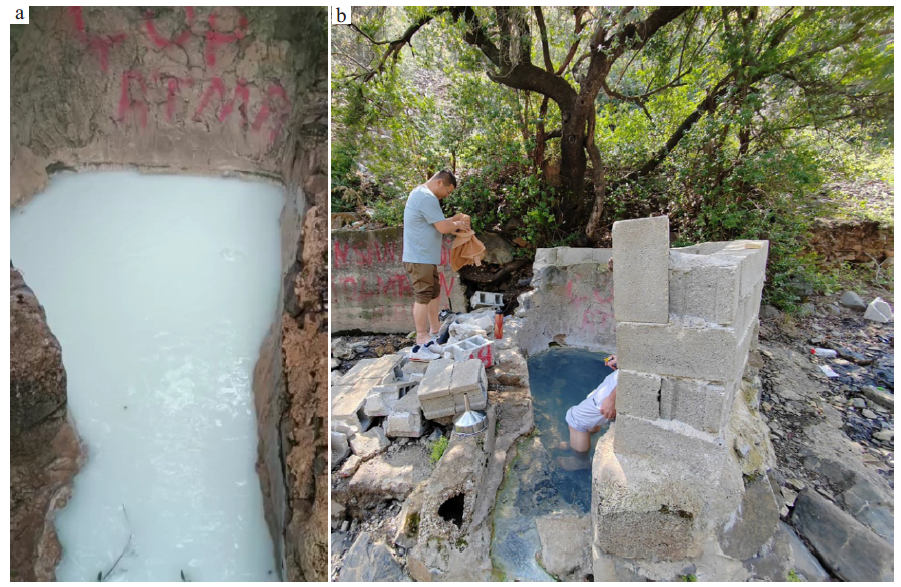


Figure S2. Statistical Figuer of trace elements (B, Al, Ba, Li, Ra and Sr). Literature data from (Aydin et al., 2020; Baba et al., 2019; Okan et al., 2018; Yuce et al., 2014; Pasvanoglu, 2020).


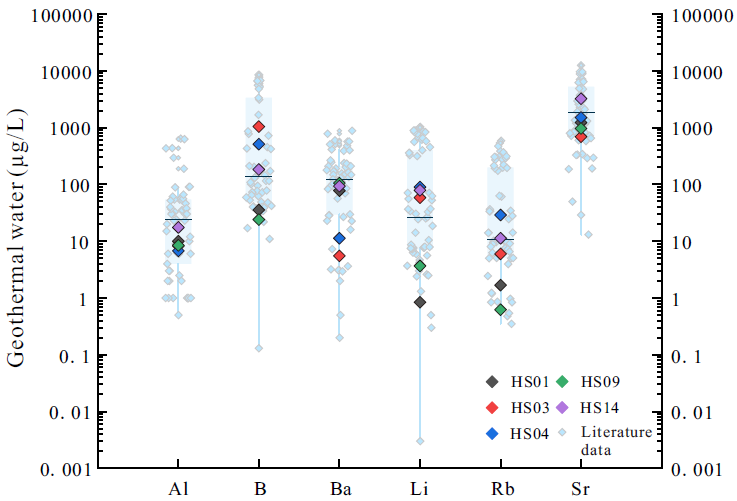


Figure S3. Spider diagram of the water in the EAFZ. Enrichment coefficients (weight ratios) normalized by Ti. EFi=(Ci/CTi)w/(Ci/CTi)r, where i is element, w is water, r is rock Rocks chemistry are taken from (Nurlu, 2020).


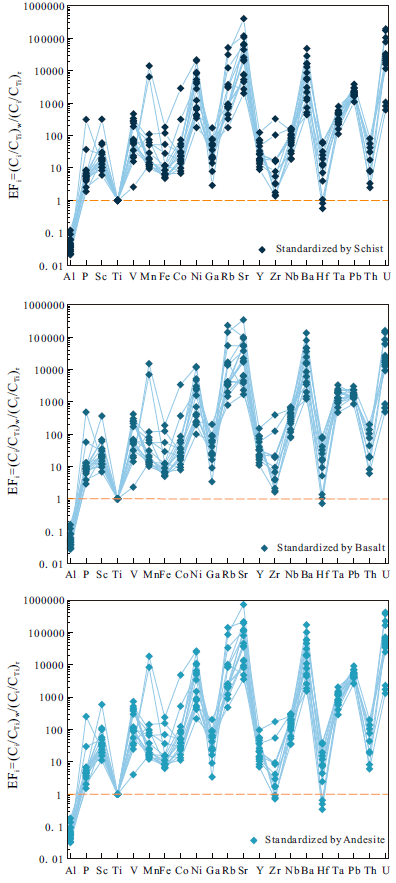


**Part4.**

Videos:

Video. 01 Seismic precursor anomaly of HS14 geothermal fluid. See Supporting Information Video. 01.

Video. 02 Post-earthquake anomaly of HS04 geothermal fluid. See Supporting Information Video. 02.

**References**

Arnórsson, S.: Chemical equilibria in icelandic geothermal systems—Implications for chemical geothermometry investigations, Geothermics, 12, 119-128, <https://doi.org/10.1016/0375-6505(83)90022-6>, 1983.

Aydin, H., Karakuş, H., and Mutlu, H.: Hydrogeochemistry of geothermal waters in eastern Turkey: Geochemical and isotopic constraints on water-rock interaction, Journal of Volcanology and Geothermal Research, 390, 10.1016/j.jvolgeores.2019.106708, 2020.

Baba, A., Şaroğlu, F., Akkuş, I., Özel, N., Yeşilnacar, M. İ., Nalbantçılar, M. T., Demir, M. M., Gökçen, G., Arslan, Ş., Dursun, N., Uzelli, T., and Yazdani, H.: Geological and hydrogeochemical properties of geothermal systems in the southeastern region of Turkey, Geothermics, 78, 255-271, <https://doi.org/10.1016/j.geothermics.2018.12.010>, 2019.

Fouillac, C. and Michard, G.: Sodium/lithium ratio in water applied to geothermometry of geothermal reservoirs, Geothermics, 10, 55-70, <https://doi.org/10.1016/0375-6505(81)90025-0>, 1981.

Fournier, R. O.: Chemical geothermometers and mixing models for geothermal systems, Geothermics, 5, 41-50, <https://doi.org/10.1016/0375-6505(77)90007-4>, 1977.

Fournier, R. O. and Truesdell, A. H.: Au empirical Na-K-Ca geothepmomete for natural waters, Geochimica Et Cosmochimica Acta, 37, 1255-1275, 1973.

Giggenbach, W. F.: Geothermal solute equilibria. Derivation of Na-K-Mg-Ca geoindicators, Geochimica et Cosmochimica Acta, 52, 2749-2765, <https://doi.org/10.1016/0016-7037(88)90143-3>, 1988.

Italiano, F., Sasmaz, A., Yuce, G., and Okan, O. O.: Thermal fluids along the East Anatolian Fault Zone (EAFZ): Geochemical features and relationships with the tectonic setting, Chemical Geology, 339, 103-114, 10.1016/j.chemgeo.2012.07.027, 2013.

Kharaka, Y. K. and Mariner, R. H.: Chemical Geothermometers and Their Application to Formation Waters from Sedimentary Basins, Thermal History of Sedimentary Basins, New York, NY, 1989//, 99-117,

Nieva, D. and Nieva, R.: Developments in geothermal energy in Mexico—part twelve. A cationic geothermometer for prospecting of geothermal resources, Heat Recovery Systems and CHP, 7, 243-258, <https://doi.org/10.1016/0890-4332(87)90138-4>, 1987.

Nurlu, N.: Geochronological, Geochemical and Sr-Nd-Pb Isotope Characteristics of the Meydan Ophiolite, SE Turkey: Petrogenesis and Implications for Mesozoic Tectonic Evolution, Geochemistry International, 58, 639-669, 10.1134/s0016702920060099, 2020.

Okan, O. O., Kalender, L., and Cetindag, B.: Trace-element hydrogeochemistry of thermal waters of Karakocan (Elazig) and Mazgirt (Tunceli), Eastern Anatolia, Turkey, Journal of Geochemical Exploration, 194, 29-43, 10.1016/j.gexplo.2018.07.006, 2018.

Parkhurst, D. L. and Appelo, C. A. J.: Description of input and examples for PHREEQC version 3: a computer program for speciation, batch-reaction, one-dimensional transport, and inverse geochemical calculations, Techniques and Methods, 6-A43, U.S. Geological Survey, Reston, VA, 10.3133/tm6A43, 2013.

Pasvanoglu, S.: Geochemistry and conceptual model of thermal waters from Ercis - Zilan Valley, Eastern Turkey, Geothermics, 86, 10.1016/j.geothermics.2020.101803, 2020.

Tonani, F. B.: Some Remarks on the Application of Geochemical Techniques in geothermal exploration, Advances in European Geothermal Research, 428-443, <https://doi.org/10.1007/978-94-009-9059-3_38>, 1980.

Yuce, G., Italiano, F., D'Alessandro, W., Yalcin, T. H., Yasin, D. U., Gulbay, A. H., Ozyurt, N. N., Rojay, B., Karabacak, V., Bellomo, S., Brusca, L., Yang, T., Fu, C. C., Lai, C. W., Ozacar, A., and Walia, V.: Origin and interactions of fluids circulating over the Amik Basin (Hatay, Turkey) and relationships with the hydrologic, geologic and tectonic settings, Chemical Geology, 388, 23-39, 10.1016/j.chemgeo.2014.09.006, 2014.

1. ★ Corresponding author

   E-mail Address: *Xiaocheng Zhou (zhouxiaocheng188@163.com)* [↑](#footnote-ref-1)
